# Supplementary material for: Mineralized collagen plywood contributes to bone autograft performance
Source: Springer Nature journal article supplement (doi:10.1038/s41586-024-08208-z), 2024-11-20
Supplement: MOESM1 [file 41586_2024_8208_MOESM1_ESM.pdf]

**Supplementary information**

---

**Mineralized collagen plywood contributes to bone autograft performance**

---

In the format provided by the authors and unedited

**Supplementary information**

---

**Mineralized collagen plywood contributes to bone autograft performance**

---

In the format provided by the authors and unedited

|                                                                | <b>Col40</b> | <b>Col100</b> | <b>Col-CHA</b> |
|----------------------------------------------------------------|--------------|---------------|----------------|
| <b>Probe diameter (μm)</b>                                     | 105          | 51            | 51             |
| <b>Lever stiffness (N/m)</b>                                   | 0.45         | 0.26          | 0.26           |
| <b>Maximum indentation depth (μm)</b>                          | 12±2         | 4±1           | 1.0±0.5        |
| <b>Maximum applied force (μN)</b>                              | 0.3±0.1      | 0.25±0.05     | 0.9±0.3        |
| <b>Contact radius (μm)</b>                                     | 34±5         | 14±2          | 9±3            |
| <b>Number of indentation tests in the statistical analysis</b> | 265          | 230           | 183            |
| <b>Median of the local Young modulus (kPa)</b>                 | 0.21         | 46            | 101            |
| <b>Average of the local Young modulus (kPa)</b>                | 0.28         | 43            | 176            |
| <b>Standard deviation of the local Young modulus (kPa)</b>     | 0.21         | 13            | 340            |

**Supplementary Table S1. Parameters and statistical analysis of indentation tests for Col40, Col100, and Col-CHA.** The full data sets are shown in Extended Data Fig. 6.

|                                                                                                             | <b>ColCG-CHA<br/>(n=12)</b> | <b>MG<br/>(n=5)</b> | <b>VO<br/>(n=5)</b> | <b>AB<br/>(n=5)</b> |
|-------------------------------------------------------------------------------------------------------------|-----------------------------|---------------------|---------------------|---------------------|
| <b>Overall ossification</b><br>image analysis from von Kossa-stained sections                               | 30.4%±7.63                  | 23.7%±12.6          | 32.0%±17.4          | 32.8%±9.2           |
| <b>New bone maturity (score 0 to 5)</b>                                                                     | 3.1±0.3                     | 2.6±0.9             | 2.2±1.1             | 4.2±0.8             |
| <b>Residual material quantity</b><br>Col-CHA or ceramics<br><b>(score 0 to 5)</b>                           | 3±1                         | 2.2±0.4             | 1.6±1.1             | 1.4±1.1             |
| <b>Osteoid production/osteoblastic activity</b> at the interface with biomaterials<br><b>(score 0 to 5)</b> | 3.6±0.5                     | 0.8±0.4             | 2.0±0               | 0.8±1.5             |
| <b>Inflammatory infiltrate (score 0 to 5)</b>                                                               | 0.6±0.9                     | 0.6±0.5             | 1.4±0.9             | 0.4±0.5             |
| <b>Fibrosis (score 0 to 5)</b>                                                                              | 1.2±0.9                     | 0.8±0.8             | 1.6±1.3             | 1.2±1.3             |

**Supplementary Table S2. Histopathological evaluation (ewe study N°2).** Scoring for the four materials (ewe study N°2): ColCG-CHA, MG, VO, and AB.
